# Supplementary material for: Reversal of methanation-oriented to RWGS-oriented Ni/SiO2 catalysts by the exsolution of Ni2+ confined in silicalite-1
Source: Royal Society of Chemistry journal article supplement (doi:10.1039/d3gc02399k), 2023-01-01
Supplement: d3gc02399k1.pdf [file d3gc02399k1.pdf]

**SUPPORTING INFORMATION**

**for**

**Reversal of methanation-oriented to RWGS-oriented Ni/SiO<sub>2</sub> catalyst  
by the exsolution of Ni<sup>2+</sup> confined in silicalite-1**

*Chia-Hung Chen,<sup>a</sup> Hong-Kai Chen,<sup>a</sup> Wei-Hsiang Huang,<sup>b</sup> Chi-Liang Chen,<sup>b</sup> Kittisak Choojun,<sup>c,d</sup> Tawan Sooknoi,<sup>c,d</sup> Hong-Kang Tian,<sup>a,e\*\*</sup> and Yu-Chuan Lin<sup>a,\*</sup>*

<sup>a</sup> Department of Chemical Engineering, National Cheng Kung University, Tainan 70101, Taiwan.

<sup>b</sup> National Synchrotron Radiation Research Center, Hsinchu 30076, Taiwan

<sup>c</sup> Department of Chemistry, School of Science, King Mongkut's Institute of Technology Ladkrabang, Chalongkrung Road, Ladkrabang, Bangkok 10520, Thailand

<sup>d</sup> Catalytic Chemistry Research Unit, School of Science, King Mongkut's Institute of Technology Ladkrabang, Chalongkrung Road, Ladkrabang, Bangkok 10520, Thailand

<sup>e</sup> Hierarchical Green-Energy Materials (Hi-GEM) Research Center, National Cheng Kung University, Tainan 70101, Taiwan

\* Corresponding authors e-mail addresses: [hktian@gs.ncku.edu.tw](mailto:hktian@gs.ncku.edu.tw) (H.-K. Tian) and [yclin768@mail.ncku.edu.tw](mailto:yclin768@mail.ncku.edu.tw) (Y.-C. Lin)

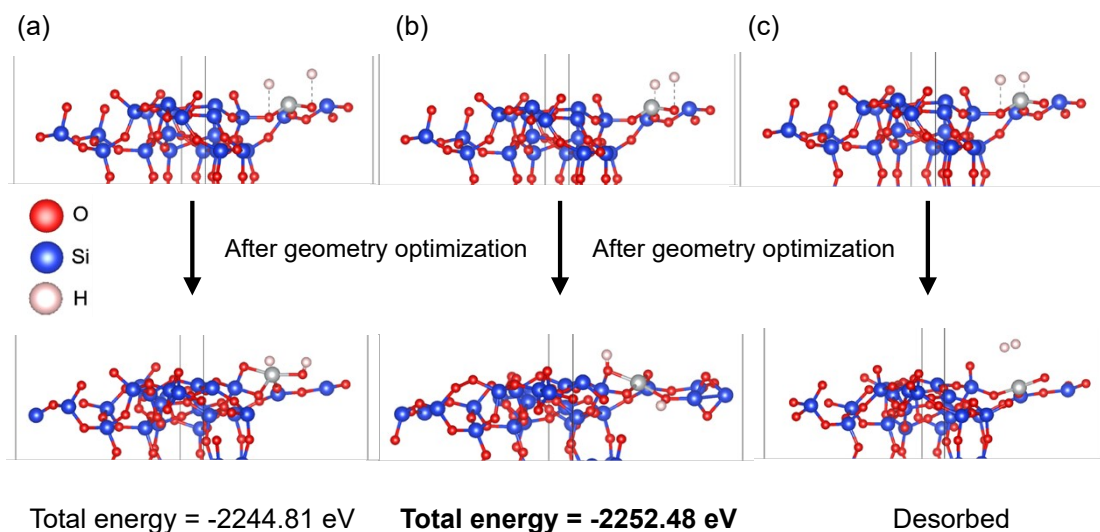

**Figure S1.** Three different configurations of the two H atoms on the surface of Ni@S-1, (a), (b), and (c). These configurations arise from the presence of three O atoms surrounding the Ni atom, resulting in three possible combinations. The (c) configuration did not yield a stable absorbed structure. On the other hand, the (b) configuration exhibited a relatively lower energy, making it the selected configuration for further analysis.

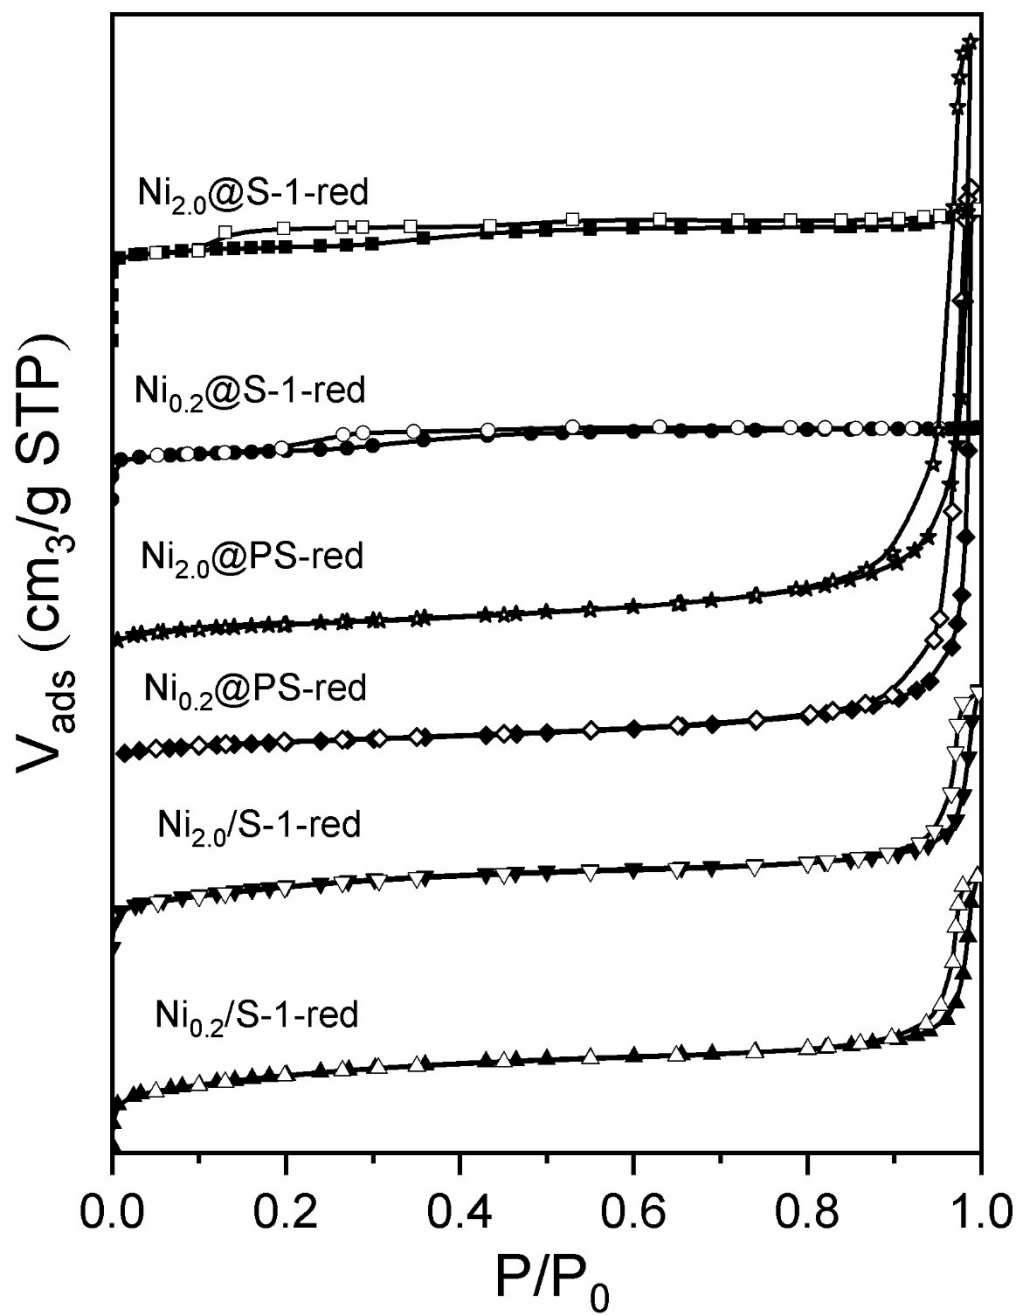

Figure S2.  $N_2$  isotherms of tested catalysts.

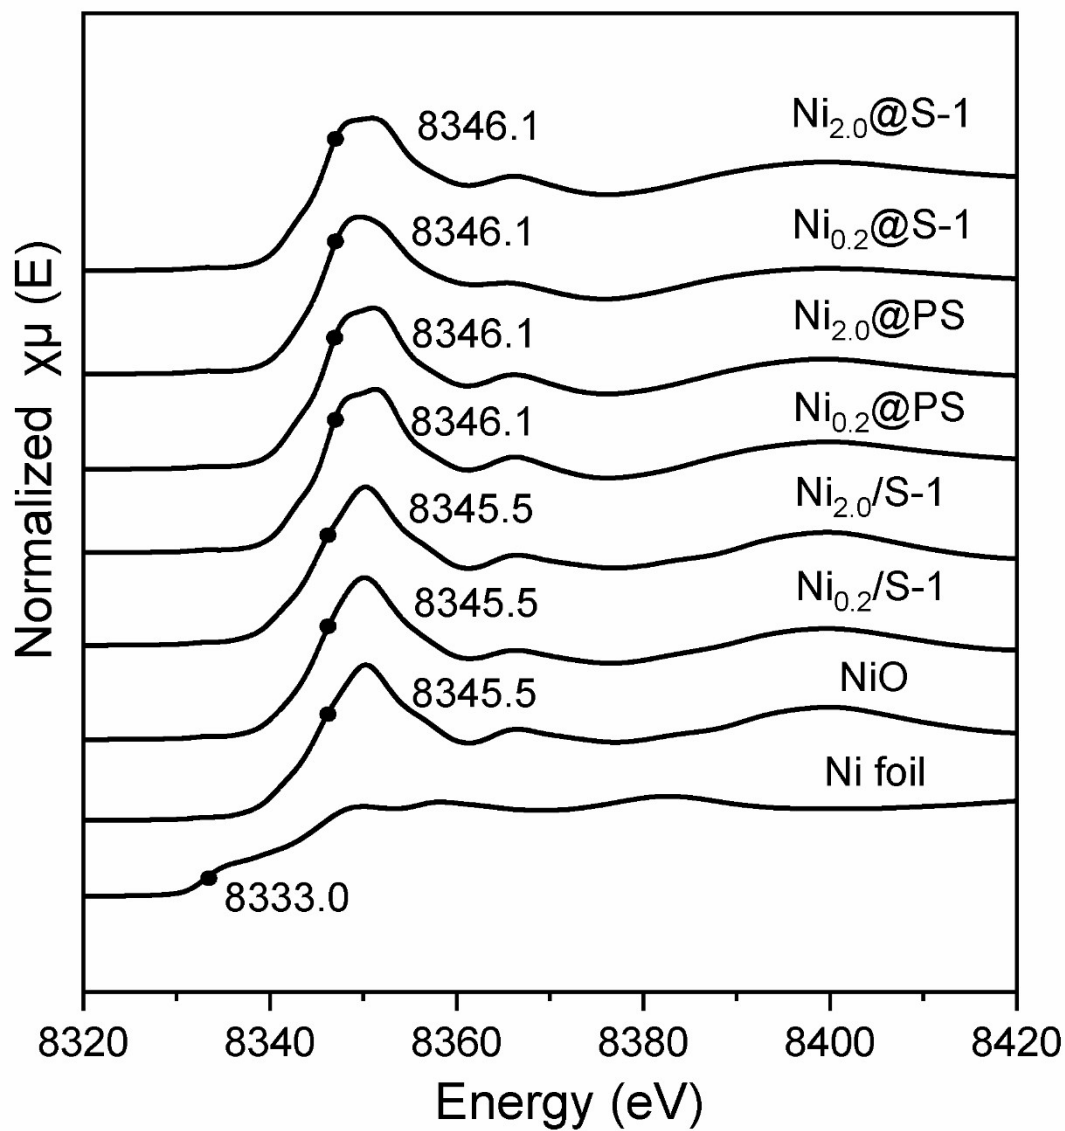

**Figure S3.** XANES spectra of the catalyst precursors at Ni *K*-edge.

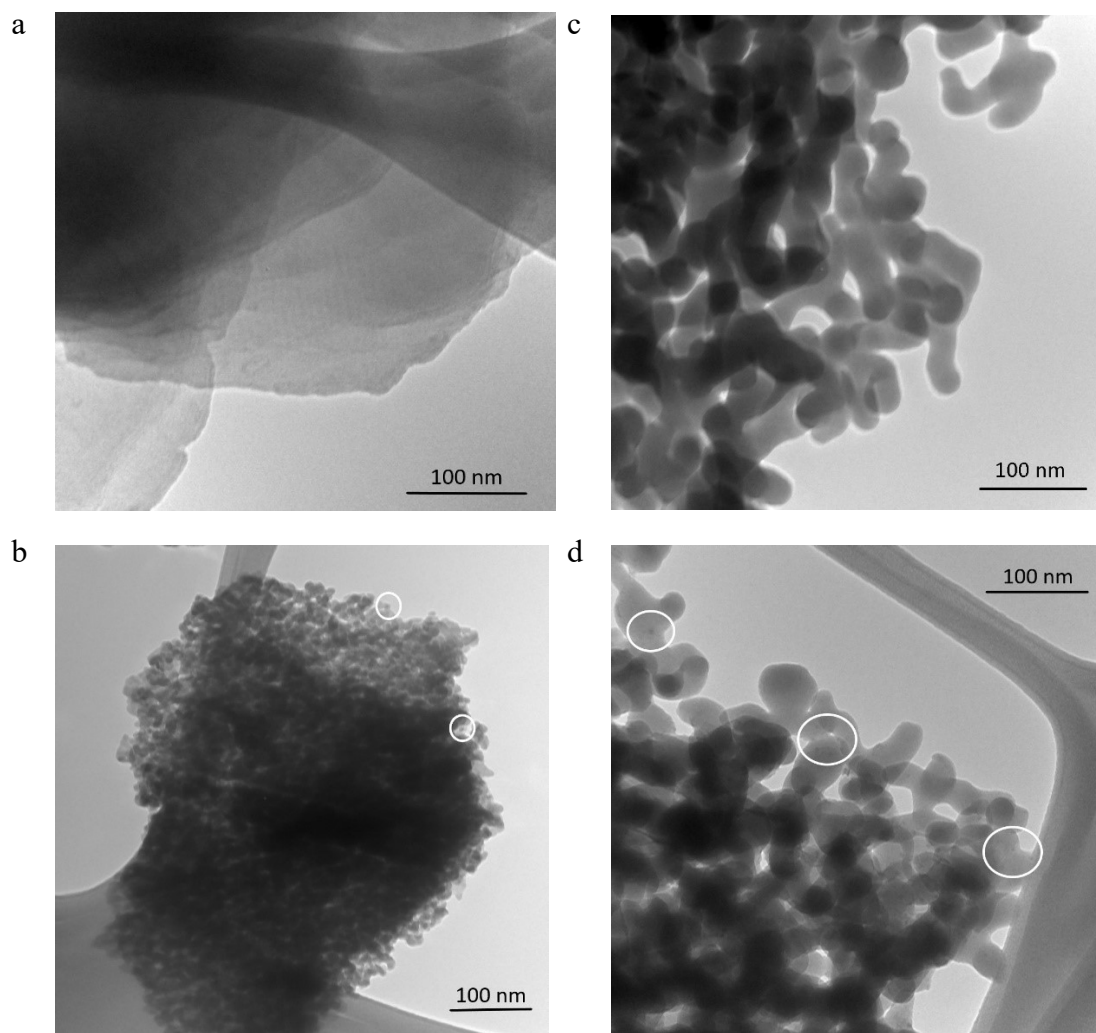

**Figure S4.** The TEM images of (a)  $\text{Ni}_{0.2}/\text{S-1-red}$ , (b)  $\text{Ni}_{2.0}/\text{S-1-red}$ , (c),  $\text{Ni}_{0.2}@PS\text{-red}$ , and (d)  $\text{Ni}_{2.0}@PS\text{-red}$ .

a

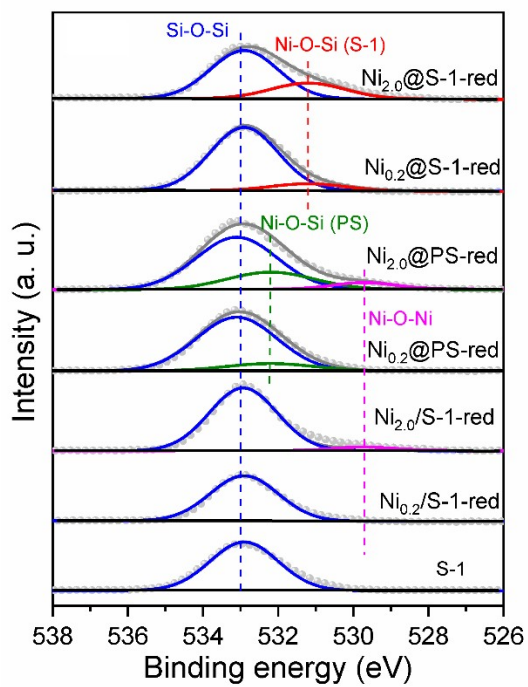

b

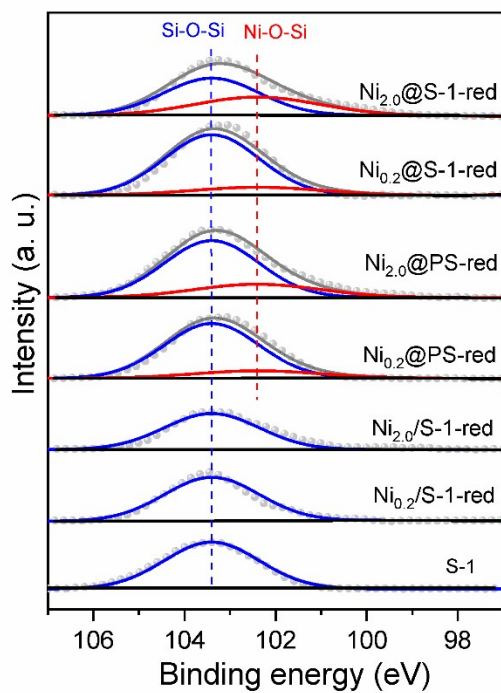

**Figure S5.** XPS spectra of (a) O 1s and (b) Si 2p photolines of the tested catalysts.

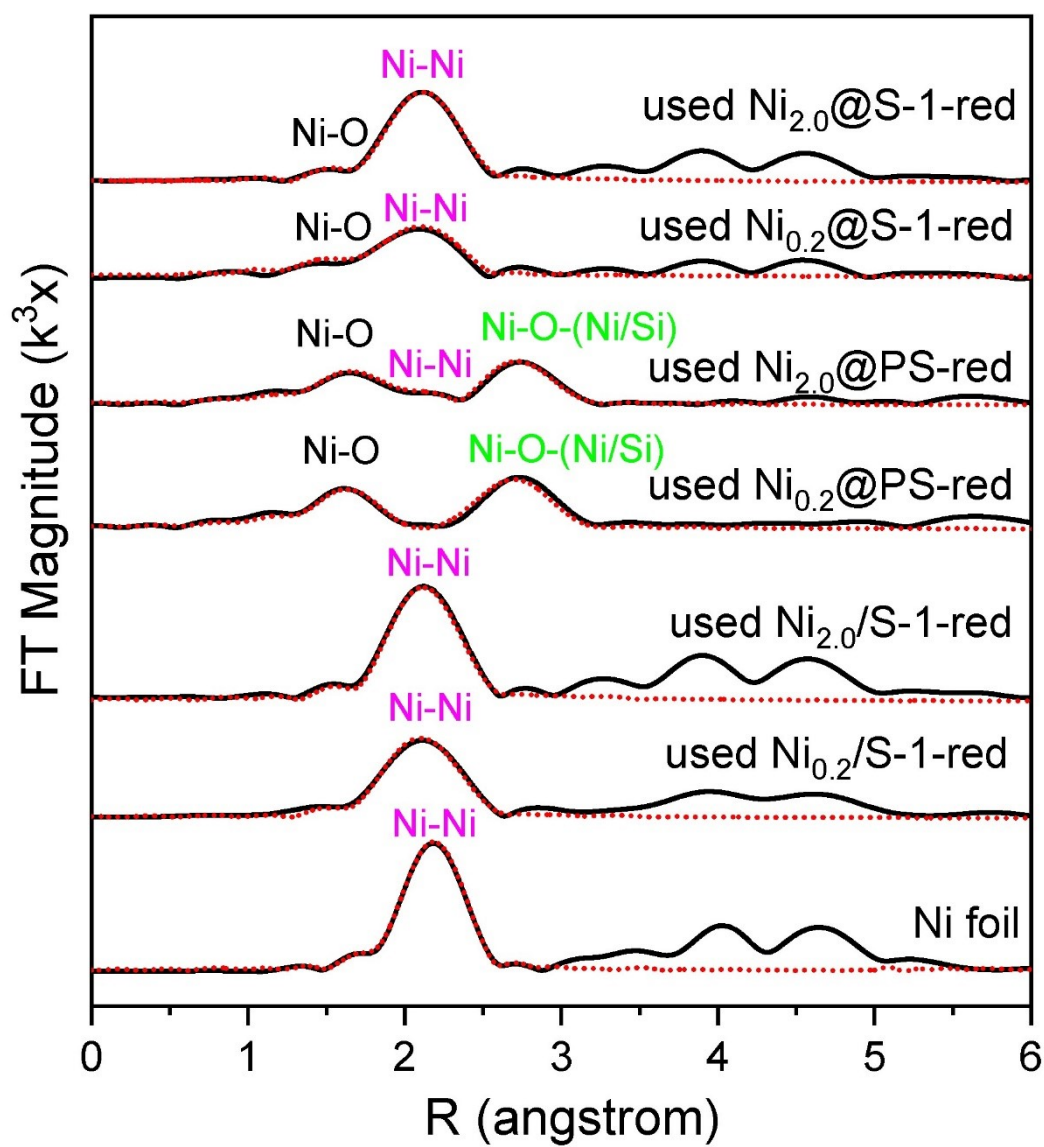

**Figure S6.** The RDF profiles of the used catalysts. The solid line represents the experimental data, and the dashed line represents the computer fit.

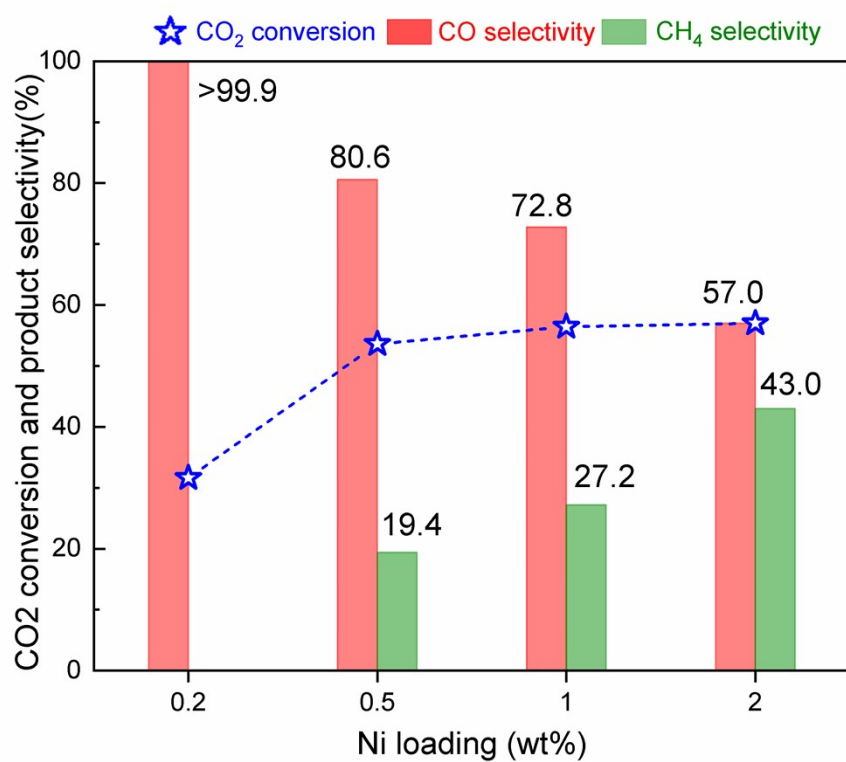

**Figure S7.** The activity tests of the Ni<sub>x</sub>@S-1-red catalysts (x = 0.2, 0.5, 1.0, and 2.0). Reaction conditions: T = 450 °C, P = 0.1 MPa, H<sub>2</sub>/CO<sub>2</sub> = 3, GHSV= 12000 mL/g<sub>Cat</sub>/h.



a

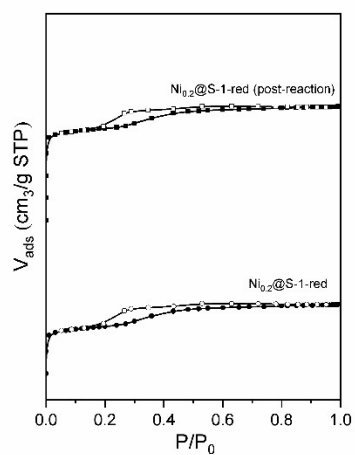

b

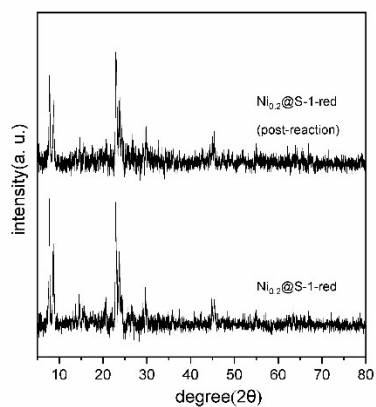

c

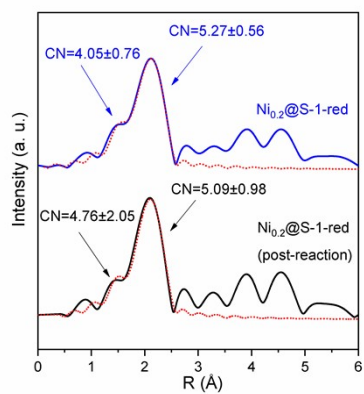

**Figure S8.** (a)  $\text{N}_2$  isotherms, (b) XRD patterns, and (c) RDF profiles of the EXAFS spectra of the fresh and the after 100 h on-stream tested  $\text{Ni}_{0.2}@\text{S-1-red}$  catalysts.

**Table S1.** Parameters obtained from the fitting results of the EXAFS data at Ni *K*-edge of the catalyst precursors.

| Sample                 | Scattering path    | CN <sup>a</sup> | R (Å) <sup>b</sup> | $\sigma^2$ (Å <sup>2</sup> ) <sup>c</sup> | R-factor |
|------------------------|--------------------|-----------------|--------------------|-------------------------------------------|----------|
| Ni <sub>2.0</sub> @S-1 | 1st (Ni-O)         | 5.58 ± 0.66     | 2.06 ± 0.01        | 0.004                                     | 0.011    |
|                        | 2nd (Ni-O-(Ni/Si)) | 7.12 ± 1.43     | 3.06 ± 0.01        | 0.008                                     |          |
| Ni <sub>0.2</sub> @S-1 | 1st (Ni-O)         | 5.75 ± 0.62     | 2.04 ± 0.01        | 0.006                                     | 0.007    |
|                        | 2nd (Ni-O-Si)      | 3.12 ± 1.06     | 3.03 ± 0.01        | 0.008                                     |          |
| Ni <sub>2.0</sub> @PS  | 1st (Ni-O)         | 6.11 ± 0.66     | 2.07 ± 0.01        | 0.005                                     | 0.009    |
|                        | 2nd (Ni-O-(Ni/Si)) | 8.07 ± 1.33     | 3.06 ± 0.01        | 0.008                                     |          |
| Ni <sub>0.2</sub> @PS  | 1st (Ni-O)         | 6.16 ± 0.69     | 2.07 ± 0.01        | 0.004                                     | 0.009    |
|                        | 2nd (Ni-O-(Ni/Si)) | 8.69 ± 1.40     | 3.05 ± 0.01        | 0.008                                     |          |
| Ni <sub>2.0</sub> /S-1 | 1st (Ni-O)         | 6.48 ± 1.02     | 2.06 ± 0.01        | 0.005                                     | 0.008    |
|                        | 2nd (Ni-O-Ni)      | 11.79 ± 1.37    | 2.95 ± 0.01        | 0.006                                     |          |
| Ni <sub>0.2</sub> /S-1 | 1st (Ni-O)         | 6.41 ± 0.73     | 2.06 ± 0.01        | 0.006                                     | 0.005    |
|                        | 2nd (Ni-O-Ni)      | 10.41 ± 1.22    | 2.96 ± 0.01        | 0.008                                     |          |
| NiO                    | 1st (Ni-O)         | 6               | 2.07 ± 0.01        | 0.006                                     | 0.003    |
|                        | 2nd (Ni-O-Ni)      | 12              | 2.95 ± 0.01        | 0.006                                     |          |

a: coordination number; b: interatomic distance; c: Debye-Waller factor

**Table S2.** Parameters obtained from the fitting results of the EXAFS data at Ni *K*-edge of the fresh catalysts.

| Sample                     | Scattering path    | CN <sup>a</sup> | R (Å) <sup>b</sup> | $\sigma^2$ (Å <sup>2</sup> ) <sup>c</sup> | R-factor |
|----------------------------|--------------------|-----------------|--------------------|-------------------------------------------|----------|
| Ni <sub>2.0</sub> @S-1-red | 1st (Ni-O)         | 1.61 ± 1.05     | 2.03 ± 0.03        | 0.011                                     | 0.001    |
|                            | 2nd (Ni-Ni)        | 8.42 ± 0.59     | 2.48 ± 0.01        | 0.006                                     |          |
| Ni <sub>0.2</sub> @S-1-red | 1st (Ni-O)         | 4.05 ± 0.76     | 2.02 ± 0.01        | 0.009                                     | 0.003    |
|                            | 2nd (Ni-Ni)        | 5.27 ± 0.56     | 2.48 ± 0.01        | 0.006                                     |          |
| Ni <sub>2.0</sub> @PS-red  | 1st (Ni-O)         | 5.23 ± 0.88     | 2.07 ± 0.02        | 0.004                                     | 0.007    |
|                            | 2nd (Ni-Ni)        | 1.39 ± 2.69     | 2.48 ± 0.03        | 0.006                                     |          |
|                            | 3rd (Ni-O-(Ni/Si)) | 6.39 ± 2.47     | 3.06 ± 0.02        | 0.007                                     |          |
| Ni <sub>0.2</sub> @PS-red  | 1st (Ni-O)         | 5.87 ± 0.70     | 2.06 ± 0.01        | 0.004                                     | 0.009    |
|                            | 2nd (Ni-O-(Ni/Si)) | 8.50 ± 1.70     | 3.05 ± 0.01        | 0.009                                     |          |
| Ni <sub>2.0</sub> /S-1-red | 1st (Ni-Ni)        | 10.39 ± 0.54    | 2.48 ± 0.01        | 0.005                                     | 0.002    |
| Ni <sub>0.2</sub> /S-1-red | 1st (Ni-Ni)        | 10.03 ± 1.39    | 2.48 ± 0.01        | 0.007                                     | 0.013    |
| Ni foil                    | 1st (Ni-Ni)        | 12              | 2.48 ± 0.01        | 0.005                                     | 0.001    |

a: coordination number; b: interatomic distance; c: Debye-Waller factor

**Table S3.** Parameters obtained from the fitting results of the EXAFS data at Ni *K*-edge of the used catalysts.

| Sample                       | Scattering path    | CN <sup>a</sup> | R (Å) <sup>b</sup> | $\sigma^2$ (Å <sup>2</sup> ) <sup>c</sup> | R-factor |
|------------------------------|--------------------|-----------------|--------------------|-------------------------------------------|----------|
| Ni <sub>2.0</sub> @S-1-spent | 1st (Ni-O)         | 1.60 ± 1.09     | 2.03 ± 0.03        | 0.011                                     | 0.001    |
|                              | 2nd (Ni-Ni)        | 8.26 ± 0.55     | 2.48 ± 0.01        | 0.005                                     |          |
| Ni <sub>0.2</sub> @S-1-spent | 1st (Ni-O)         | 4.76 ± 2.05     | 2.02 ± 0.02        | 0.012                                     | 0.011    |
|                              | 2nd (Ni-Ni)        | 5.09 ± 0.98     | 2.47 ± 0.01        | 0.006                                     |          |
| Ni <sub>2.0</sub> @PS-spent  | 1st (Ni-O)         | 5.27 ± 0.76     | 2.07 ± 0.02        | 0.004                                     | 0.008    |
|                              | 2nd (Ni-Ni)        | 1.47 ± 2.43     | 2.48 ± 0.03        | 0.007                                     |          |
|                              | 3rd (Ni-O-(Ni/Si)) | 6.28 ± 2.07     | 3.06 ± 0.02        | 0.007                                     |          |
| Ni <sub>0.2</sub> @PS-spent  | 1st (Ni-O)         | 5.81 ± 0.68     | 2.06 ± 0.01        | 0.004                                     | 0.014    |
|                              | 2nd (Ni-O-(Ni/Si)) | 8.20 ± 1.61     | 3.06 ± 0.01        | 0.009                                     |          |
| Ni <sub>2.0</sub> /S-1-spent | 1st (Ni-Ni)        | 10.42 ± 0.68    | 2.48 ± 0.01        | 0.005                                     | 0.004    |
| Ni <sub>0.2</sub> /S-1-spent | 1st (Ni-Ni)        | 10.12 ± 1.39    | 2.48 ± 0.01        | 0.007                                     | 0.014    |
| Ni foil                      | 1st (Ni-Ni)        | 12              | 2.48 ± 0.01        | 0.005                                     | 0.001    |

a: coordination number; b: interatomic distance; c: Debye-Waller factor
